# Supplementary material for: Machine Learning Classifies Ferroptosis and Apoptosis Cell Death Modalities with TfR1 Immunostaining
Source: PubMed Central journal article supplement — ACS Chem Biol. 2022 Mar 1;17(3):654–60. doi: 10.1021/acschembio.1c00953 (PMC8938922; doi:10.1021/acschembio.1c00953), 2022-03-01
Supplement: cb1c00953_si_001.pdf [file cb1c00953_si_001.pdf]

# Machine learning classifies ferroptosis and apoptosis cell death modalities with TfR1 immunostaining

supporting information: R code

Jenny Jin, Kenji Schorpp, Daniel Samaga, Kristian Unger, Kamyar Hadian, Brent R. Stockwell

08/02/2022

## Contents

|                                                      |          |
|------------------------------------------------------|----------|
| <b>Concepts</b>                                      | <b>1</b> |
| Machine Learning for Multiclass Prediction . . . . . | 1        |
| Data Transformation . . . . .                        | 2        |
| Regression Models . . . . .                          | 2        |
| <b>Data</b>                                          | <b>3</b> |
| Import . . . . .                                     | 3        |
| Variance Stabilization . . . . .                     | 5        |
| Dimensionality Reduction . . . . .                   | 6        |
| <b>Binary Prediction</b>                             | <b>8</b> |
| RSL3 vs DMSO . . . . .                               | 8        |
| RSL3 and STS . . . . .                               | 9        |
| <b>Multiclass Prediction</b>                         | <b>9</b> |
| 4-class Signature . . . . .                          | 10       |
| 3-class Signature (Ferroptosis, Apoptosis) . . . . . | 11       |
| heatmaps . . . . .                                   | 16       |

## Concepts

### Machine Learning for Multiclass Prediction

Classification denotes the estimation of class-membership  $c \in \{1, \dots, C\}$  of an object on basis of its attributes  $x = (x_1, \dots, x_p)$ , which are given as a feature vector - or feature matrix  $X$  in case of  $n$  objects ( $x_{ij} \in \mathbb{R}^{n \times p}$ ). In supervised machine learning, algorithms are used to extract information about class-membership from samples with known class (model discovery), which can be applied to predict class membership for samples with unknown class or to estimate quality of model performance on validation data.

Classification concepts are, for instance

- linear classifiers (i.e. The ‘machine’ learns the coefficients  $\beta$  of a generalized linear model  $y = X\beta$ , which fit discovery data the ‘best’.  $y$  is connected to class membership, e.g. the logit (log-odds  $\log(p/(1-p))$ ). Those estimated coefficients  $\hat{\beta}_j$  are easy to interpret and can be applied for sample classification to any new feature vector  $z$  by calculating  $z^T \hat{\beta}$ )

- support vector machines (i.e. a hyperplane is constructed in the high-dimensional feature space, which separates two groups the best. Extensions of this idea can be applied for multi-class prediction. However the classifier itself is almost impossible to interpret)
- k-nearest neighbors approach (i.e. classifying new objects  $z$  on the basis of their distance  $d(z, x_i), i \in \{1, \dots, n\}$  to the objects of the discovery data. Obviously the choice of distance measure  $d$  and  $k$  are crucial)
- decision trees (i.e. during discovery, single yes/no decisions are extracted (e.g.  $x_{12} < 0.4$ ) and used to construct a decision tree. Along this tree, new samples can be classified. Drawback: trees can be highly instable, when training samples are small with respect to number of features. Random forests create many decision trees and their prediction is more robust, drawback is, they are hard to analyse/interpret)
- neural networks (i.e. inspired by neuron layers in the brain, layers of artificial neurons are trained to predict  $c$  from  $x$ . The trained network is a black box)

## Multiclass Classification

Some approaches originated in binary decisions. Logistic regression, for instance, only is applicable to two-class prediction.

Besides generalizations of the approach to multiclass prediction, like multinomial logistic regression, there is always the option of ‘one-vs-all’ (OvA) or ‘one-vs-one’ (OvO) strategies. In OvA and OvO approaches a set of binary classifiers (class  $c_1$  vs ‘the rest’ and  $c_2$  vs ‘the rest’ and  $\dots$  ; or  $c_1$  vs  $c_2$  and  $c_1$  vs  $c_3$  and  $\dots$ ) is built and the set of single decisions is reduced to a single decision by a rule like ‘take the class, which is chosen most often’ etc.

## Data Transformation

No classification tool is able to do magic tricks. Every tool is dependent on accessibility to informative aspects in the feature matrix. Therefore, it is often recommendable to consider log-transformation of positive and skewed data (e.g. Box-Cox-transformation).

Furthermore, many machine learning algorithms suffer from highly correlated features. (moreover, highly correlated features cannot carry much information, from an information theoretical point of view). Thus, unsupervised feature selection should be considered (note, supervised feature selection must be placed within k-fold-cross-validation strategies).

Another strategy is reduction of dimensionality by principal component analysis (PCA) - but here generalizability of results is affected and interpretation of the classifier at the end is tedious.

Note, that transformation steps as featurewise normalization/scaling can be pitfalls in the anticipated applicability of the classifier. Single objects cannot be normalized/scaled. Furthermore shifts in class-proportions from discovery to training data will crush classifier performance. Therefore, scaling factors and normalization coefficients must be transferred from discovery data to validation data or new data and thus are inseparable from the classifier itself (i.e. most often pointless).

## Data Visualization

Visualization techniques (e.g. tSNE) are key in explorative data analysis. For classification they are mostly pointless unless there is a direct connection to the chosen classification method like linear- or quadratic discriminant analysis or clustering-based-approaches.

## Regression Models

- full transparency

- easy interpretation
- toolbox of feature selection methods for two-class scenarios
- prediction of class from new independent single samples

```
#install.packages("glmnet")
rm(list = ls())
library(glmnet)
```

```
## Loading required package: Matrix
```

```
## Loaded glmnet 4.1-2
```

## Recap multinomial logistic regression

Multinomial distribution (see Fahrmeir, for  $q + 1$  classes):  $\sum_{i=1}^{q+1} \pi_i = 1$ ,

$$f(x_1, \dots, x_q; \pi) = \frac{N!}{\mathbf{x}_1! \dots \mathbf{x}_q! (N - \sum_{j=1}^q \mathbf{x}_j)!} \prod_{i=1}^q \pi_i^{\mathbf{x}_i} (1 - \sum_{j=1}^q \pi_j)^{N - \sum_{j=1}^q \mathbf{x}_j}$$

Tutz, Poessnecker and Uhlmann ‘Variable Selection in General Multinomial Logit Models’: ‘2.1. Multinomial Logit Model with Category-Specific Covariates’

Model:

$$\pi_{ir} = P(Y = r | \mathbf{x}_i) = \frac{\exp(\beta_{r0} + \mathbf{x}_i^T \beta_r)}{\sum_{s=1}^k \exp(\beta_{s0} + \mathbf{x}_i^T \beta_s)} = \frac{\exp(\eta_{ir})}{\sum_{s=1}^k \exp(\eta_{is})}$$

Variable selection apparently non-trivial (see Tutz et al.). Therefore two-step approach.

0. data transformation and variable selection (excluding highly correlated features)
1. pairwise logistic lasso regression
2. multinomial logistic lasso regression on subset of variables (e.g. union of features selected by lassos)

also see <https://glmnet.stanford.edu/articles/glmnet.html#multinomial-regression-family-multinomial->

## Data

### Import

```
if (file.exists("ML_ferroptosis_data_complete.Rdata")){
  load("ML_ferroptosis_data_complete.Rdata")
} else {
  col.mms <- function(data){
    X.median <- data[,grep("Median.per.Well", colnames(data))]
    colnames(X.median) <- substr(colnames(X.median), start = 28, stop = 999)
    X <- X.median
    return(X)
  }
  # +-----+
  # | Collect data |
  # +-----+
```

```

Exp.list <- c("2021-03-04","2021-04-01")
treat.list <- c("DMSO","IKE","RSL3","STS")
X.complete <- NULL
for (cur.exp in Exp.list){
  for (cur.tre in treat.list){
    if (file.exists(paste0(cur.exp,
      " ",cur.tre,
      " data_red_channel_wo_border_objects_ALL_single_cells.txt"))){
      # import red, blue, green channel data
      d1 <- read.table(file = paste0(cur.exp,
        " ",cur.tre,
        " data_red_channel_wo_border_objects_ALL_single_cells.txt"),
        sep = '\t',header = T)
      d2 <- read.table(file = paste0(cur.exp,
        " ",cur.tre,
        " data_blue-green_channel_wo_border_objects_ALL_single_cells.txt"),
        sep = '\t',header = T)
      # merge features
      d <- merge(x = d1,y = d2,by = "WellName")
      # organize imported data and attach to data.frame
      X.part <- cbind(data.frame("Exp" = rep(cur.exp,nrow(d)),
        "Treatment" = cur.tre),
        col.mms(d))
      X.complete <- rbind(X.complete,X.part)
    }
  }
  rm(X.part,d1,d2,d)
}
rm(cur.exp,cur.tre,Exp.list,treat.list,col.mms)
save(list = c("X.complete"),file = "ML_ferroptosis_data_complete.Rdata")
}
X.complete <- X.complete[,colMeans(is.na(X.complete[X.complete$Exp=="2021-03-04",]))==0]

```

## PCA

```

library(ggplot2)
library(ggfortify)
X <- X.complete[X.complete$Exp=="2021-03-04",]
D <- X[,3:ncol(X)]
PCA <- prcomp(D,scale. = T)
X <- cbind(X[,1:2],PCA$x[,1:3])
lab_ap <- autoplot(PCA,plot = F)
ggplot(X, aes(PC1, PC2, col=Treatment, fill= Treatment)) +
  geom_point() + scale_y_continuous(trans = "reverse") +
  stat_ellipse(geom = "polygon", col = "black", alpha = 0.1)+
  scale_color_manual(values=c("black", "darkgreen", "darkorange", "red")) +
  theme_grey() + xlab(lab_ap$labels$x) + ylab(lab_ap$labels$y)

```

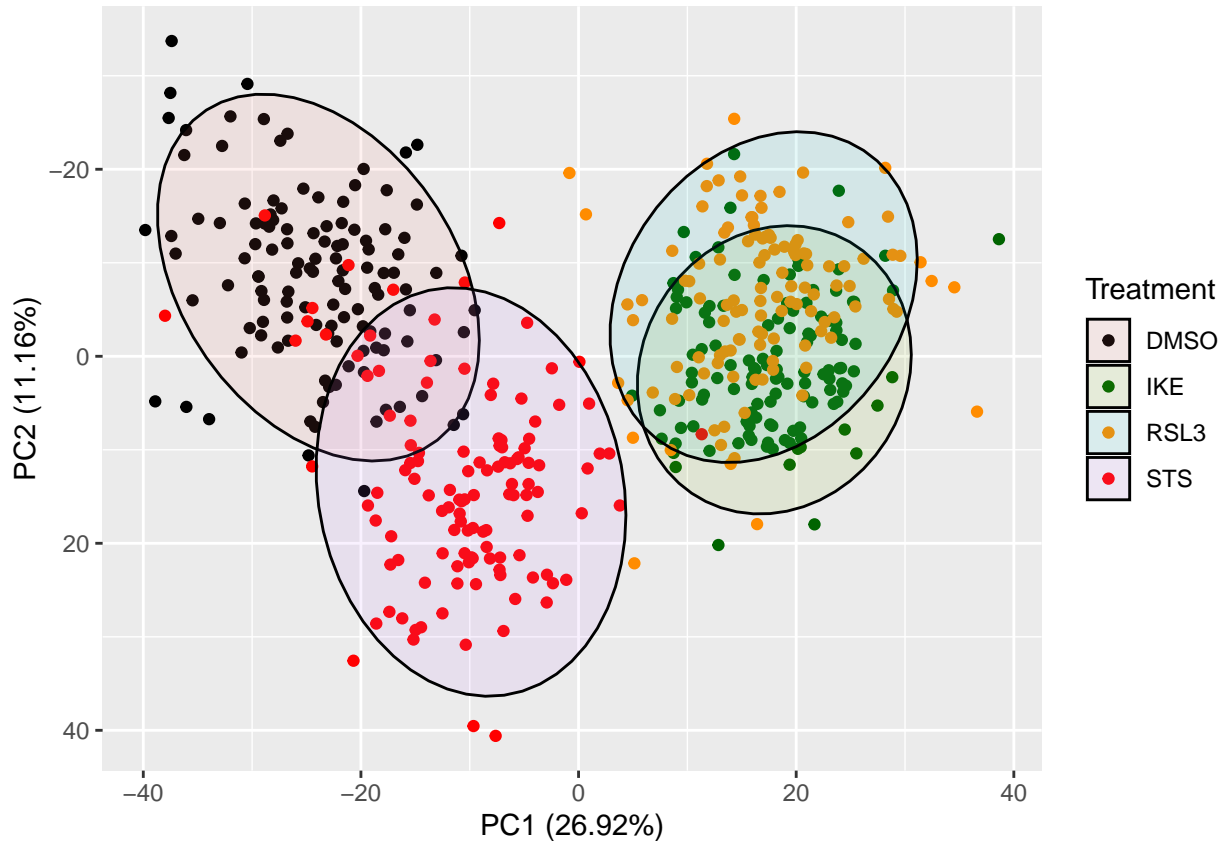

```
rm(D,X,PCA,lab_ap)
```

## Variance Stabilization

```
FM <- as.matrix(X.complete[,3:ncol(X.complete)])

vorher.norm <- 0
N.feature <- ncol(FM)
is.log.feature <- rep(FALSE,N.feature)
for (i in 1:N.feature){
  p.ref <- shapiro.test(FM[X.complete$Exp=="2021-03-04",i])$p.value
  p.tra <- shapiro.test(log10(1+FM[X.complete$Exp=="2021-03-04",i]))$p.value
  if ((p.ref < 0.05) & (p.ref < p.tra)){
    is.log.feature[i] <- TRUE
    FM[,i] <- log10(1+FM[,i])
  } else {
    vorher.norm <- vorher.norm + 1
  }
}
print(vorher.norm)
```

```
## [1] 259
```

```
sum(is.log.feature)
```

```
## [1] 1114
```

```
rm(is.log.feature,N.feature)
rm(p.ref,p.tra,vorher.norm,i)

X.complete[,3:ncol(X.complete)] <- FM
rm(FM)
```

## Dimensionality Reduction

### Check for Correlations

Goal: identify clusters of highly correlated features.

- for each feature: count number of other features, that have absolute (Pearson) correlation of more than 0.9.
- starting from the feature with highest number of correlated partners, remove all partners from the data set.
- iterate until no pair of features has correlation higher than 0.9

```
list_cors <- function(X){
  N.f <- ncol(X)
  sp <- data.frame("i" = rep(NA,(N.f-1)*N.f/2),
                  "j" = NA,
                  "r" = NA,
                  "i.name" = NA,
                  "j.name" = NA)

  k <- 1
  for (i in 2:(N.f)){
    x <- X[,i]
    x.name <- colnames(X)[i]
    for (j in 1:(i-1)){
      sp$i[k] <- i
      sp$j[k] <- j
      sp$r[k] <- cor(x,X[,j])
      sp$i.name[k] <- x.name
      sp$j.name[k] <- colnames(X)[j]
      k <- k+1
    }
    cat(i)
    cat(".")
  }
  sp$i <- as.numeric(sp$i)
  sp$j <- as.numeric(sp$j)
  sp$r <- as.numeric(sp$r)
  return(sp)
}

X.disc <- X.complete[X.complete$Exp=="2021-03-04",]
if (!file.exists("ML_ferroptosis_temp_skipCorrCalc_1.Rdata")){
  sp.cors <- list_cors(X = X.disc[,3:ncol(X.disc)])
  save(list = c("sp.cors","X.complete"),
       file = "ML_ferroptosis_temp_skipCorrCalc_1.Rdata")
} else {
  load("ML_ferroptosis_temp_skipCorrCalc_1.Rdata")
}
```

```

}

max(sp.cors$r)

## [1] 1
sum(abs(sp.cors$r) > 0.8)

## [1] 24291
sum(abs(sp.cors$r) > 0.9)

## [1] 9079
sum(abs(sp.cors$r) > 0.95)

## [1] 2741
rm(list_cors)

```

## Exclude Redundancies

Keep only one representative feature from clusters of highly correlated features. Here, iteratively the feature with the largest number of correlations ( $> 0.9$ ) to other features is marked as representative and all correlated features are removed from analysis.

```

remove_cors <- function(X,sp,s = 0.9){
  features <- data.frame("Id" = colnames(X),"N.cor" = NA)
  for (i in 1:nrow(features)){
    c.f <- features$Id[i]
    features$N.cor[i] <- sum(abs(sp$r[(sp$i.name == c.f)|(sp$j.name == c.f)]) > s)
  }
  if (max(features$N.cor) >= 1){
    bleibt.index <- which.max(features$N.cor)
    bleibt.name <- features$Id[bleibt.index]
    X.bleibt <- sp[(((sp$i.name == (bleibt.name)) |
                    (sp$j.name == (bleibt.name))) &
                    (abs(sp$r) > s)),]
    raus.namen <- unique(c(X.bleibt[,4],X.bleibt[,5]))
    raus.namen <- raus.namen[raus.namen!=bleibt.name]
    X <- X[!(colnames(X) %in% raus.namen)]
    sp <- sp[!(sp$i.name %in% raus.namen) & !(sp$j.name %in% raus.namen)],]
  }
  for (i in 1:nrow(X.bleibt)){
    if (X.bleibt$i.name[i] != bleibt.name){
      X.bleibt[i,1:2] <- X.bleibt[i,2:1]
      X.bleibt[i,4:5] <- X.bleibt[i,5:4]
    }
  }
  result <- list("X" = X,"sp" = sp,
                "bleibt.i" = bleibt.index,"bleibt.n" = bleibt.name,
                "raus.namen" = raus.namen,"represents" = X.bleibt)
  return(result)
}

if (!file.exists("ML_ferroptosis_temp_skipCorrCalc_2.Rdata")){

```

```

aus <- remove_cors(X = X.disc[,3:ncol(X.disc)],sp = sp.cors,s = 0.9)
represents <- aus$represents
X.disc <- cbind(X.disc[,1:2],aus$X)
sp.cors <- aus$sp
while (max(abs(sp.cors$r)) > 0.9){
  aus <- remove_cors(X = X.disc[,3:ncol(X.disc)],sp = sp.cors,s = 0.9)
  represents <- rbind(represents,aus$represents)
  X.disc <- cbind(X.disc[,1:2],aus$X)
  sp.cors <- aus$sp
  print(c(sum(abs(sp.cors$r)>0.9),max(abs(sp.cors$r))))
}
colnames(represents) <- c("kept.i","repr.j","r","kept.name","repr.name")
rm(aus,sp.cors,remove_cors)
save(list = ls(),file = "ML_ferroptosis_temp_skipCorrCalc_2.Rdata")
} else {
rm(remove_cors,sp.cors)
load(file = "ML_ferroptosis_temp_skipCorrCalc_2.Rdata")
}

```

## Binary Prediction

As a proof of principle, we check, if binary prediction is possible.

### RSL3 vs DMSO

```

X.full <- X.complete[,colnames(X.disc)]
X.sub <- subset.data.frame(x = X.full,subset = Treatment %in% c("DMSO","RSL3"))
train <- subset.data.frame(x = X.sub,subset = Exp == "2021-03-04")[,-1]
test <- subset.data.frame(x = X.sub,subset = Exp == "2021-04-01")[,-1]
test.full <- subset.data.frame(x = X.full,subset = Exp != "2021-03-04")[,-1]

y.out <- ifelse(test = train[,1]=="RSL3",yes = 1,no = 0)
x.in <- as.matrix(train[,-1])
mod <- cv.glmnet(y = y.out,x = x.in,family = "binomial",alpha = 1)

out <- predict(object = mod,
               newx = as.matrix(test[,-1]),
               s = mod$lambda.1se,
               type = "class")
ttt <- table(out,test[,1])
ttt

##
## out DMSO RSL3
##  0  107   0
##  1   13 119

# accuracy:
sum(diag(ttt))/sum(ttt)

## [1] 0.9456067

```



works perfect! - 95% accuracy in independent validation data.

---

Prediction of untrained classes:

```
out <- predict(object = mod,
               newx = as.matrix(test.full[,-1]),
               s = mod$lambda.1se,
               type = "class")
table(out,test.full[,1])
```

```
##
## out DMSO IKE RSL3 STS
##  0  107  0   0  30
##  1   13 120 119  90
```

- IKE classified as RSL3.
- STS non-uniform, but rather non-DMSO

## RSL3 and STS

train RSL3 vs STS - is IKE classified as RSL3?

```
X.sub <- subset.data.frame(x = X.full,subset = Treatment %in% c("RSL3","STS"))
train <- subset.data.frame(x = X.sub,subset = Exp == "2021-03-04")[,-1]
test <- subset.data.frame(x = X.full,subset = Exp == "2021-04-01")[,-1]
```

```
y.out <- ifelse(test = train[,1]=="STS",yes = 1,no = 0)
x.in <- as.matrix(train[,-1])
mod <- cv.glmnet(y = y.out,x = x.in,family = "binomial",alpha = 1)
```

```
out <- predict(object = mod,
               newx = as.matrix(test[,-1]),
               s = mod$lambda.1se,
               type = "class")
ttt <- table(out,test[,1])
ttt
```

```
##
## out DMSO IKE RSL3 STS
##  0   0 113 108  6
##  1 120  7  11 114
```

```
rm(mod,out,train,test.full,test,x.in,X.sub,ttt,y.out)
```

## Multiclass Prediction

- binary logistic lasso models pairwise
- take union of all selected variables
- train multinomial logistic regression lasso model

## 4-class Signature

### Discovery and Validation

```
#load(file = "ML_ferroptosis_Xfull.Rdata")
# +-----+
  cur.seed <- 1119
  set.seed(cur.seed)
# save(list = "cur.seed",file = "CurSeed.Rdata")
# +-----+
classes <- unique(X.full$Treatment)
pairs <- data.frame("A" = classes[c(1,1,1,2,2,3)],
                   "B" = classes[c(2,3,4,3,4,4)])

selected <- NULL
for (j in 1:nrow(pairs)){
  X.sub <- subset.data.frame(x = X.full,subset = Treatment %in% pairs[j,])
  train <- subset.data.frame(x = X.sub,subset = Exp == "2021-03-04")[,-1]
  test <- subset.data.frame(x = X.sub,subset = Exp == "2021-04-01")[,-1]
  y.out <- ifelse(test = train[,1]==pairs[j,2],yes = 1,no = 0)
  x.in <- as.matrix(train[,-1])
  mod <- cv.glmnet(y = y.out,x = x.in,family = "binomial",alpha = 1)
  selected <- unique(c(selected,
                       as.character(rownames(coef(mod)))[as.numeric(coef(mod))!=0]))
}
selected <- selected[-1]

X.fs <- X.full[,c("Exp","Treatment",selected)]
N.fs <- ncol(X.fs)

train <- subset.data.frame(x = X.fs,subset = Exp == "2021-03-04")[,-1]
test <- subset.data.frame(x = X.fs,subset = Exp == "2021-04-01")[,-1]
y.out <- train[,1]
x.in <- as.matrix(train[,-1])
mod <- cv.glmnet(y = y.out,
                 x = x.in,
                 family = "multinomial",
                 type.multinomial = "ungrouped",
                 alpha = 1,
                 type.measure = "class")
out <- predict(object = mod,
               newx = as.matrix(test[,-1]),
               s = mod$lambda.1se,
               type = "class")

table(out,test[,1])

##
## out      DMSO IKE RSL3 STS
##  DMSO   101  0   0   0
##  IKE     18 89  89  8
##  RSL3    0 31  29  0
##  STS     1  0   1 112
```

```

mean(out == test[,1])

## [1] 0.691023

ttt <- table(out,test[,1])
ttt3 <- cbind(ttt[,1],ttt[,2]+ttt[,3],ttt[,4])
ttt3 <- rbind(ttt3[1,],ttt3[2,]+ttt3[3,],ttt3[4,])
ttt3

##      [,1] [,2] [,3]
## [1,]  101   0   0
## [2,]   18 238   8
## [3,]    1   1 112

sum(diag(ttt3))/sum(ttt3)

## [1] 0.9415449

rm(mod,out,pairs,train,ttt3,x.in,y.out,ttt,selected,X.fs,N.fs,classes,j,X.sub)

```

### 3-class Signature (Ferroptosis, Apoptosis)

```

X.full$Treatment[X.full$Treatment %in% c("IKE", "RSL3")] <- "ferroptosis"
X.full$Treatment[X.full$Treatment %in% c("STS")] <- "apoptosis"
X.full$Treatment[X.full$Treatment %in% c("DMSO")] <- "healthy"
classes <- unique(X.full$Treatment)
pairs <- data.frame("A" = classes[c(1,1,2)], "B" = classes[c(2,3,3)])

selected <- NULL
for (j in 1:nrow(pairs)){
  X.sub <- subset.data.frame(x = X.full,subset = Treatment %in% pairs[j,])
  train <- subset.data.frame(x = X.sub,subset = Exp == "2021-03-04")[,-1]
  test <- subset.data.frame(x = X.sub,subset = Exp == "2021-04-01")[,-1]
  y.out <- ifelse(test = train[,1]==pairs[j,2],yes = 1,no = 0)
  x.in <- as.matrix(train[,-1])
  mod <- cv.glmnet(y = y.out,x = x.in,family = "binomial",alpha = 1)
  selected <- unique(c(selected,
    as.character(rownames(coef(mod)))[as.numeric(coef(mod))!=0]))
}
pairwise_features <- selected[-1]

X.fs <- X.full[,c("Exp","Treatment",selected[-1])]
N.fs <- ncol(X.fs)

train <- subset.data.frame(x = X.fs,subset = Exp == "2021-03-04")[,-1]
test <- subset.data.frame(x = X.fs,subset = Exp == "2021-04-01")[,-1]
y.out <- train[,1]
x.in <- as.matrix(train[,-1])
mod <- cv.glmnet(y = y.out,
  x = x.in,
  family = "multinomial",
  type.multinomial = "ungrouped",
  alpha = 1,
  type.measure = "class")

```

```

out <- predict(object = mod,
               newx = as.matrix(test[,-1]),
               s = mod$lambda.1se,
               type = "class")

table(out,test[,1])

##
## out          apoptosis ferroptosis healthy
## apoptosis    103           0          0
## ferroptosis   17          239         15
## healthy       0            0         105

mean(out == test[,1])

## [1] 0.9331942

rm(out,pairs,train,x.in,X.sub,classes,j,N.fs,selected,y.out)

```

### figure scores

```

out.score <- predict(object = mod,
                    newx = as.matrix(test[,-1]),
                    s = mod$lambda.1se)

part1 <- test[,1] == "healthy"
part2 <- test[,1] == "ferroptosis"
part3 <- test[,1] == "apoptosis"
sicher <- apply(X = out.score,MARGIN = 1,FUN = max)
sicher1 <- sicher[part1]
sicher2 <- sicher[part2]
sicher3 <- sicher[part3]
reihenfolge1 <- order(sicher1,decreasing = T)
reihenfolge2 <- order(sicher2,decreasing = T)
reihenfolge3 <- order(sicher3,decreasing = T)
rm(sicher,sicher1,sicher2,sicher3,part1,part2,part3)

reihenfolge <- c(reihenfolge1,
                reihenfolge2+length(reihenfolge1),
                reihenfolge3+length(reihenfolge1)+length(reihenfolge2))
rm(reihenfolge1,reihenfolge2,reihenfolge3)
#pdf(file = "Fig_Validation_Scores.pdf",width = 10,height = 3.3)
par(mar = c(2.5,2,0.5,0.5))
plot(out.score[reihenfolge,3,1],pch = 20,
     col = rgb(red = 0.5,green = 0.5,blue = 0.5,alpha = 0.5,maxColorValue = 1),
     ylim = c(-3.3,4.1),xaxt = 'n',yaxt = 'n',ann = F)
par(new = T)
plot(out.score[reihenfolge,1,1],pch = 20,
     col = rgb(red = 0.9,green = 0.1,blue = 0.1,alpha = 0.5,maxColorValue = 1),
     ylim = c(-3.3,4.1),xaxt = 'n',yaxt = 'n',ann = F)
par(new = T)
plot(out.score[reihenfolge,2,1],pch = 20,
     col = rgb(red = 0.1,green = 0.1,blue = 0.9,alpha = 0.5,maxColorValue = 1),

```

```

ylim = c(-3.3,4.1),xaxt = 'n',yaxt = 'n',
ylab = "score for class",font = 12,
mgp = c(0.5,2,1),xlab = "")
legend(x = 400,
       y = 4.1,
       legend = c("score control","score ferroptosis","score apoptosis"),
       fill = F,
       col = c(rgb(red = 0.5,green = 0.5,blue = 0.5,alpha = 0.5,
                    maxColorValue = 1),
               rgb(red = 0.1,green = 0.1,blue = 0.9,alpha = 0.5,
                    maxColorValue = 1),
               rgb(red = 0.9,green = 0.1,blue = 0.1,alpha = 0.5,
                    maxColorValue = 1)),
       pch = 19,density = F,lty = 0,border = F,text.font = 12)
axis(side = 1,at = c(60,240,420),font = 12,
      labels = c("control samples","ferroptosis samples","apoptosis samples"))
abline(v = 120.5,lwd = 2)
abline(v = 359.5,lwd = 2)

```

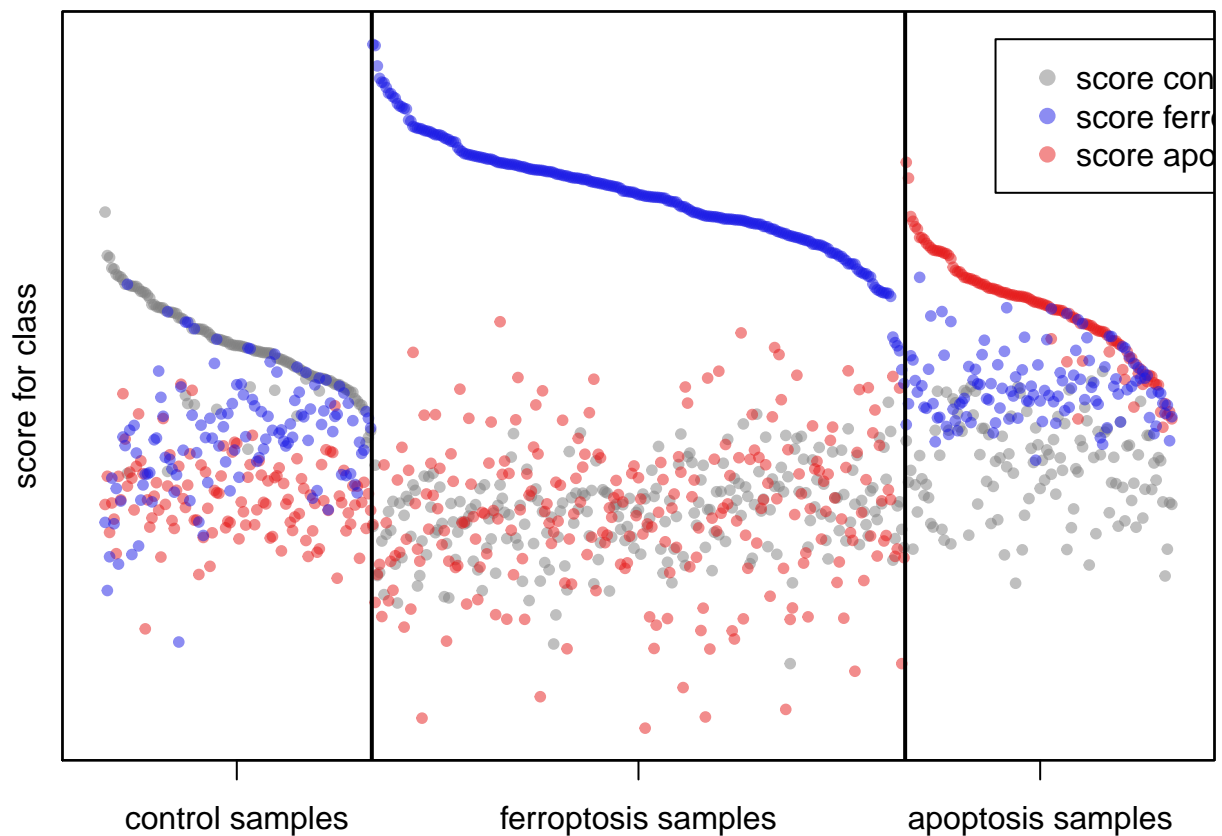

```

rm(out.score,reihenfolge)
#dev.off()

```

## Summary Variables

Coefficients used (separately for classes) - summed up in table:

```

mod.full <- mod
coef.mod <- coef(mod.full)
mod.1 <- coef.mod$healthy
P.h <- cbind(as.character(rownames(mod.1))[as.numeric(mod.1)!=0],
            round(as.numeric(mod.1)[as.numeric(mod.1)!=0],digits = 3))
mod.1 <- coef.mod$ferroptosis
P.f <- cbind(as.character(rownames(mod.1))[as.numeric(mod.1)!=0],
            round(as.numeric(mod.1)[as.numeric(mod.1)!=0],digits = 3))
mod.1 <- coef.mod$apoptosis
P.a <- cbind(as.character(rownames(mod.1))[as.numeric(mod.1)!=0],
            round(as.numeric(mod.1)[as.numeric(mod.1)!=0],digits = 3))
selected <- data.frame("Var" = unique(c(P.h[,1],P.f[,1],P.a[,1])),
                      "h" = 0, "f" = 0, "a" = 0)
for (i in 1:nrow(P.h)){
  selected$h[which(selected$Var == P.h[i,1])] <- as.numeric(P.h[i,2])
}
for (i in 1:nrow(P.f)){
  selected$f[which(selected$Var == P.f[i,1])] <- as.numeric(P.f[i,2])
}
for (i in 1:nrow(P.a)){
  selected$a[which(selected$Var == P.a[i,1])] <- as.numeric(P.a[i,2])
}
Ferroptosis.Signature <- selected
rm(coef.mod,mod.1,mod.full,P.a,P.f,P.h,i)

```

## table S2

Table S2 from the supporting information is exported from the object represents.

```

saf <- represents[represents$kept.name %in% Ferroptosis.Signature$Var,]
saf$kept.name <- gsub(x = saf$kept.name,pattern = "..Median.per.Well.x",replacement = "red")
saf$repr.name <- gsub(x = saf$repr.name,pattern = "..Median.per.Well.x",replacement = "red")
saf$kept.name <- gsub(x = saf$kept.name,pattern = "..Median.per.Well.y",replacement = "bluegreen")
saf$repr.name <- gsub(x = saf$repr.name,pattern = "..Median.per.Well.y",replacement = "bluegreen")
saf$kept.name <- gsub(x = saf$kept.name,pattern = "..Median.per.Well",replacement = "")
saf$repr.name <- gsub(x = saf$repr.name,pattern = "..Median.per.Well",replacement = "")
for (feat in unique(saf$kept.name)){
  block <- subset.data.frame(saf,subset = kept.name == feat)
  saf[which(saf$kept.name == feat),] <- block[order(block$r,decreasing = T),]
}
rownames(saf) <- 2:(1+nrow(saf))
colnames(saf) <- c("i","j","correlation coefficient","feature in signature","correlated feature (|r| > 0.9)")
saf$`correlation coefficient` <- round(saf$`correlation coefficient`,digits = 3)
head(saf[,3:5])

```

```

## correlation coefficient feature in signature
## 2 0.997 Cytoplasm.Region.Radial.Mean.SER.Edge.bluegreen
## 3 0.997 Cytoplasm.Region.Radial.Mean.SER.Edge.bluegreen
## 4 0.996 Cytoplasm.Region.Radial.Mean.SER.Edge.bluegreen
## 5 0.996 Cytoplasm.Region.Radial.Mean.SER.Edge.bluegreen
## 6 0.994 Cytoplasm.Region.Radial.Mean.SER.Edge.bluegreen
## 7 0.994 Cytoplasm.Region.Radial.Mean.SER.Edge.bluegreen
## correlated feature (|r| > 0.9)

```

```
## 2 Cytoplasm.Region.Radial.Mean.SER.Valley.bluegreen
## 3   Cytoplasm.Region.Radial.Mean.SER.Dark.bluegreen
## 4 Cytoplasm.Region.Radial.Mean.SER.Saddle.bluegreen
## 5   Cytoplasm.Region.Radial.Mean.SER.Hole.bluegreen
## 6     Cytoplasm.Region.Radial.Mean..bluegreen
## 7 Cytoplasm.Region.Radial.Mean.SP.Filter.bluegreen
```

## Variable Importance

```
selected$sd <- NA
train <- subset.data.frame(x = X.fs,subset = Exp == "2021-03-04"),[-1]
for (i in 2:nrow(selected)){
  selected$sd[i] <- round(sd(train[,selected$Var[i]]),digits = 3)
}
selected$importance <- round(apply(X = abs(selected[,2:5]),
                                MARGIN = 1,
                                FUN = max) * selected$sd,digits = 3)

Ferroptosis.Signature.sortiert <- selected[order(selected$importance,decreasing = T),]
Ferroptosis.Signature.sortiert
```

```
##                                     Var
## 21                               Nucleus.Region.Blue.SER.Saddle.2.px...Median.per.Well
## 18                               Membrane.Region.Profile.1.5.SP.Filter...Median.per.Well.y
## 19                               Intensity.Nucleus.Region.Red.Contrast...Median.per.Well
## 7                                 Cytoplasm.Region.Roundness...Median.per.Well
## 3                                 Cytoplasm.Region.Width..px...Median.per.Well
## 9                                 Cytoplasm.Region.Red.SER.Ridge.0.px...Median.per.Well
## 12                               Cytoplasm.Region.Radial.Mean.SER.Edge...Median.per.Well.y
## 5                                 Membrane.Region.Green.SER.Ridge.2.px...Median.per.Well
## 4                                 Membrane.Region.Green.SER.Hole.2.px...Median.per.Well
## 2                                 Intensity.Membrane.Region.Red.Contrast...Median.per.Well
## 13                               Nucleus.Region.Red.SER.Bright.1.px...Median.per.Well
## 14                               Nucleus.Region.Red.SER.Valley.2.px...Median.per.Well
## 10 Membrane.Region.Threshold.Compactness.30..SER.Bright...Median.per.Well.x
## 20                               Nucleus.Region.Blue.SER.Edge.2.px...Median.per.Well
## 6                                 Cytoplasm.Region.Radial.Mean.Ratio.SER.Spot...Median.per.Well.x
## 11                               Nucleus.Region.Threshold.Compactness.50..SER.Edge...Median.per.Well.y
## 24                               Nucleus.Region.Blue.SER.Dark.2.px...Median.per.Well
## 15                               Nucleus.Region.Profile.5.5.SP.Filter...Median.per.Well.x
## 8                                 Membrane.Region.Red.SER.Valley.0.px...Median.per.Well
## 22 Membrane.Region.Threshold.Compactness.40..SER.Dark...Median.per.Well.y
## 17                               Cytoplasm.Region.Profile.4.5...Median.per.Well.x
## 23                               Membrane.Region.Profile.1.5...Median.per.Well.x
## 16                               Nucleus.Region.Radial.Mean.Ratio.SER.Bright...Median.per.Well.x
## 1                                     (Intercept)
##          h          f          a    sd importance
## 21    0.000    0.000 1306.847 0.001         1.307
## 18    0.000 -25.089    0.000 0.022         0.552
## 19    0.000    0.000    3.994 0.099         0.395
## 7     22.679    0.000    0.000 0.016         0.363
## 3     2.331    0.000    0.000 0.152         0.354
## 9     0.000 -33.494    0.000 0.010         0.335
```

```
## 12  0.000 -2.309  0.000 0.102  0.236
## 5  103.084  0.000  0.000 0.002  0.206
## 4  197.007  0.000  0.000 0.001  0.197
## 2  -1.413  0.000  0.000 0.137  0.194
## 13  0.000 -25.307  0.000 0.007  0.177
## 14  0.000 46.000  0.000 0.003  0.138
## 10  0.000  5.208  0.000 0.025  0.130
## 20  0.000  0.000 27.524 0.003  0.083
## 6   4.707  0.000  0.000 0.016  0.075
## 11  0.000  3.162  0.000 0.023  0.073
## 24  0.000  0.000 71.024 0.001  0.071
## 15  0.000 -2.158  0.000 0.029  0.063
## 8   0.000 -0.665  0.000 0.085  0.057
## 22  0.000  0.000 -1.932 0.018  0.035
## 17  0.000 -0.664  0.000 0.041  0.027
## 23  0.000  0.000 -2.453 0.004  0.010
## 16  0.000 -0.002  0.000 0.010  0.000
## 1  -7.590 10.716 -3.126  NA    NA
```

```
rm(test,train,X.fs,i)
```

## heatmaps

```
library(circlize)
library(ComplexHeatmap)
library(glmnet)
```

## discovery data

```
# Full scaled discovery-matrix
# -----
train <- subset.data.frame(x = X.complete,subset = Exp == "2021-03-04")[,-c(1,2)]

X.uncor <- X.full
Add.Info <- data.frame("ID" = colnames(train),
                      "is.cor.excluded" = TRUE,
                      "is.pariwise.lasso.selected" = FALSE,
                      "is.signature" = FALSE)
Add.Info$is.cor.excluded[Add.Info$ID %in% colnames(X.uncor)] <- FALSE
Add.Info$is.pariwise.lasso.selected[Add.Info$ID %in% pairwise_features] <- TRUE
Add.Info$is.signature[Add.Info$ID %in% Ferroptosis.Signature$Var] <- TRUE
summary(Add.Info)

##      ID          is.cor.excluded is.pariwise.lasso.selected is.signature
## Length:1373      Mode :logical   Mode :logical           Mode :logical
## Class :character FALSE:595      FALSE:1328             FALSE:1350
## Mode  :character TRUE :778        TRUE :45                TRUE :23

# -----
# load("ML_Ferroptosis_temp_skipCorrCalc_2.Rdata")
# order features by appearance in represents[,1:2]
reprs <- unique(represent$kept.name)
```



```

N.cluster <- length(reprs)
features <- NULL
for (i in 1:N.cluster){
  features <- c(features,
                reprs[i],
                represents$repr.name[represents$kept.name==reprs[i]])
}

X.scale <- scale(train)
features <- c(features,colnames(train)[!(colnames(train) %in% features)])

X_mat <- X.scale[,features] # 480 x 1373
X_mat <- t(X_mat)

rownames(Add.Info) <- Add.Info$ID
Add.Info <- Add.Info[features,]

varvektor <- features[features %in% Ferroptosis.Signature$Var[2:24]]
varvektor <- gsub(pattern = "Median.per.Well",replacement = "",x = varvektor)
varvektor <- gsub(pattern = "Membrane",replacement = "Membr",x = varvektor)
varvektor <- gsub(pattern = "Cytoplasm",replacement = "Cytopl",x = varvektor)
varvektor <- gsub(pattern = "Nucleus",replacement = "Nucl",x = varvektor)
varvektor <- gsub(pattern = "Region",replacement = "Reg",x = varvektor)
varvektor <- gsub(pattern = "Intensity",replacement = "Intens",x = varvektor)
varvektor <- gsub(pattern = "Threshold",replacement = "Thresh",x = varvektor)
varvektor <- gsub(pattern = "Compactness",replacement = "Comp",x = varvektor)
varvektor <- gsub(pattern = "Roundness",replacement = "Round",x = varvektor)
varvektor <- gsub(pattern = "Contrast",replacement = "Contr",x = varvektor)
varvektor <- gsub(pattern = "\\.\.\.",replacement = ".",x = varvektor)
varvektor <- gsub(pattern = "\\.\.\.",replacement = ".",x = varvektor)
varvektor <- gsub(pattern = "Radial",replacement = "Rad",x = varvektor)
varvektor <- gsub(pattern = "\\x",replacement = ".red",x = varvektor)
varvektor <- gsub(pattern = "\\y",replacement = ".blgr",x = varvektor)

anno_df <- data.frame(included = !Add.Info$is.cor.excluded,
                      selected = Add.Info$is.pariwise.lasso.selected,
                      classifier = Add.Info$is.signature)
anno_mat <- as.matrix(anno_df)

col_fun <- colorRamp2(c(-3, 3), c("yellow", "black"))

N.sig <- nrow(Ferroptosis.Signature)-1
dort <- rep(NA,N.sig)
for (i in 1:N.sig){
  cur.feats <- Ferroptosis.Signature$Var[i+1]
  dort[i-1] <- which(features==cur.feats)
}

ha <- HeatmapAnnotation(df = anno_df,which = "row",
                        col = list(included = c("TRUE" = "black","FALSE" = "white"),
                                   selected = c("TRUE" = "black","FALSE" = "white"),
                                   classifier = c("TRUE" = "black","FALSE" = "white")),
                        foo = anno_mark(at = sort(dort),

```

```

        labels = varvektor,
        labels_gp = gpar(fontsize = 10))
#pdf(file = "Fig_discovery_yb.pdf",width = 10,height = 7)
Heatmap(matrix = X_mat,name = " ",col = col_fun,
        row_order = 1:1373,
        column_order = 1:480,
        column_split = rep(c("DMSO","IKE","RSL3","STS"),each = 120),
        column_gap = unit(c(2,0.2,2), "mm"),
        row_title = "features (sorted by size of correlation clusters)",
        row_title_gp = gpar(fontsize = 12, fontface = "bold"),
        column_title = "control (DMSO) - ferroptosis (IKE, RSL3) - apoptosis (STS)",
        column_title_side = "bottom",
        column_title_gp = gpar(fontsize = 12, fontface = "bold"),
        show_row_names = FALSE,
        show_column_names = FALSE,
        right_annotation = ha)

```

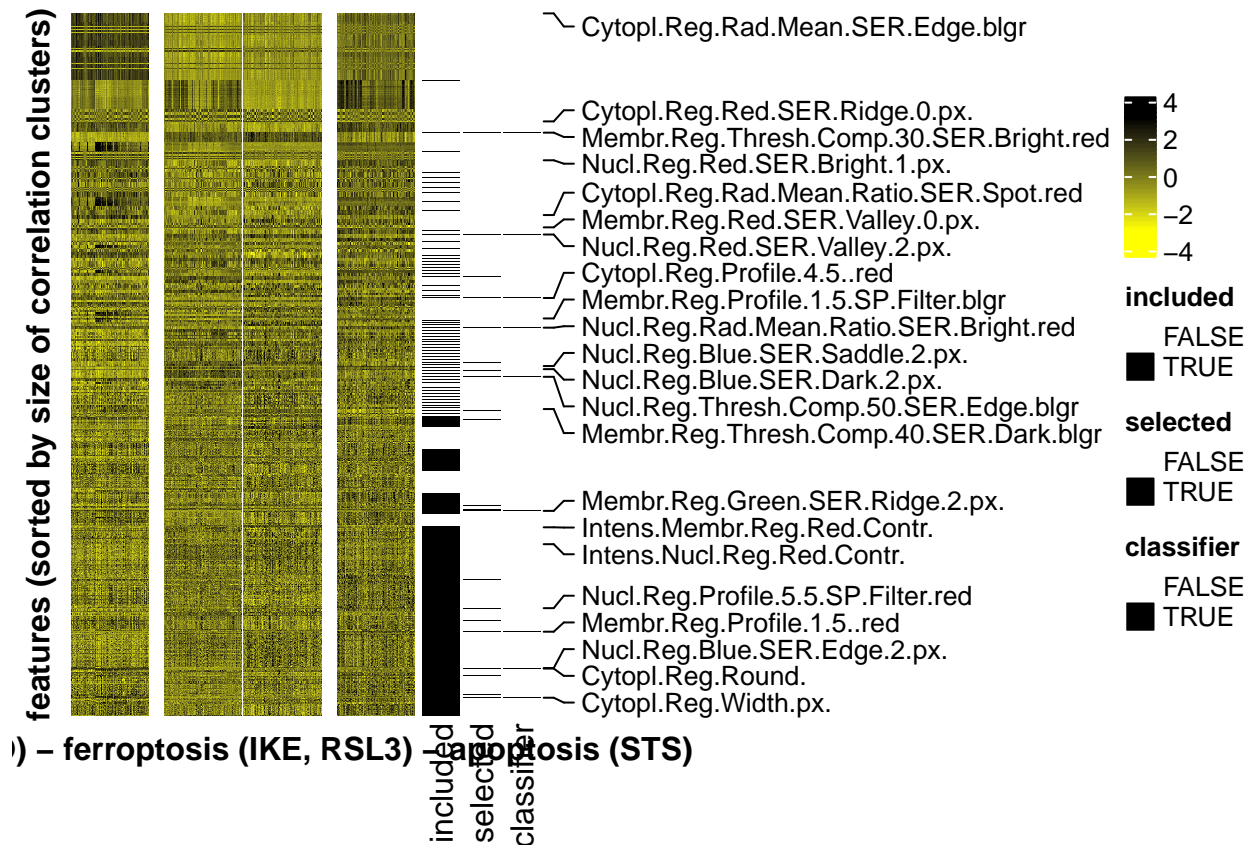

```

rm(ha,X_mat,dort)
#dev.off()

```

validation data

```

valData <- subset.data.frame(x = X.complete,subset = Exp == "2021-04-01")[,-c(1,2)]
VD.scale <- scale(valData)
SignaturSortiertFigure <- c(Ferroptosis.Signature$Var[1],

```

```

features[features %in% Ferroptosis.Signature$Var])
VD_mat <- VD.scale[,SignaturSortiertFigure[2:24]] # 480 x 1373
VD_mat <- t(VD_mat)
col_gr <- colorRamp2(c(-3, 3), c("yellow", "black"))

#pdf(file = "Fig_valdata_yb.pdf",width = 10,height = 1.75)
Heatmap(matrix = VD_mat,name = " ",col = col_gr,
  row_order = 1:23,
  column_order = 1:479,
  column_split = rep(c("DMSO","IKE","RSL3","STS"),c(120,120,119,120)),
  column_gap = unit(c(2,0.2,2), "mm"),
  row_title = "classifier features",
  row_title_gp = gpar(fontsize = 10, fontface = "bold"),
  column_title = "control (DMSO) - ferroptosis (IKE, RSL3) - apoptosis (STS)",
  column_title_side = "bottom",
  column_title_gp = gpar(fontsize = 10, fontface = "bold"),
  show_row_names = FALSE,
  show_column_names = FALSE)

```

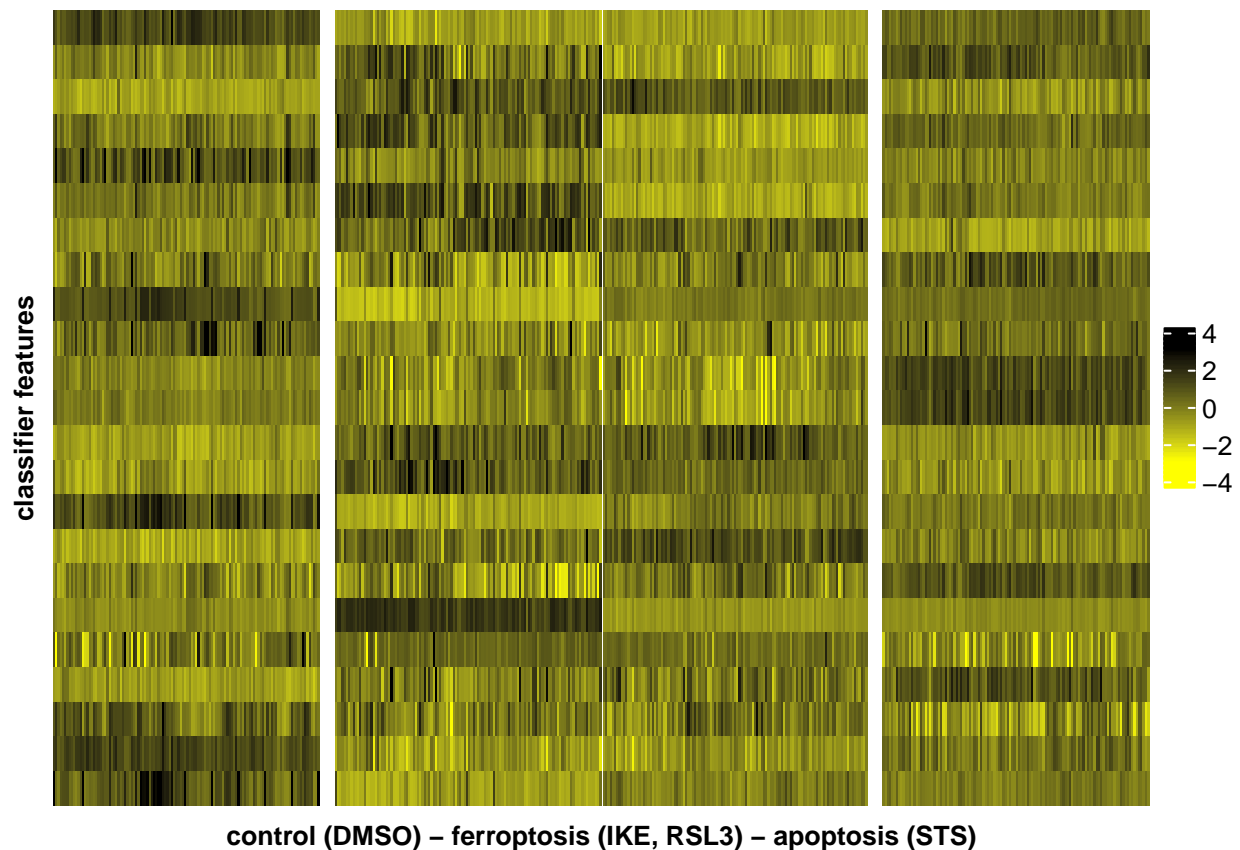

```
#dev.off()
```
