# Supplementary material for: Machine Learning Classifies Ferroptosis and Apoptosis Cell Death Modalities with TfR1 Immunostaining
Source: PubMed Central journal article supplement — ACS Chem Biol. 2022 Mar 1;17(3):654–60. doi: 10.1021/acschembio.1c00953 (PMC8938922; doi:10.1021/acschembio.1c00953), 2022-03-01
Supplement: cb1c00953_si_002.pdf [file cb1c00953_si_002.pdf]

## Supporting Information

### Machine learning classifies ferroptosis and apoptosis cell death modalities with TfR1 immunostaining

Jenny Jin<sup>1,2,#</sup>, Kenji Schorpp<sup>3,#</sup>, Daniel Samaga<sup>4,#</sup>, Kristian Unger<sup>4</sup>, Kamyar Hadian<sup>3,\*</sup>,  
Brent R. Stockwell<sup>1,2,5,6\*</sup>

<sup>1</sup>Department of Biological Sciences, Columbia University, New York, NY 10027, USA

<sup>2</sup>Department of Chemistry, Columbia University, New York, NY 10027, USA

<sup>3</sup>HelmholtzZentrum München, German Research Center for Environmental Health, Cell Signaling and Chemical Biology, Institute for Molecular Toxicology and Pharmacology, 85764 Neuherberg, Germany

<sup>4</sup>HelmholtzZentrum München, German Research Center for Environmental Health, Research Unit Radiation Cytogenetics, 85764 Neuherberg, Germany

<sup>5</sup>Herbert Irving Comprehensive Cancer Center, Columbia University Irving Medical Center, New York, NY 10032, USA

<sup>6</sup>Irving Institute for Cancer Dynamics, Columbia University, New York, NY 10027

#These authors contributed equally

\*Corresponding authors:

Brent R. Stockwell, [bstockwell@columbia.edu](mailto:bstockwell@columbia.edu);

Kamyar Hadian, [kamyar.hadian@helmholtz-muenchen.de](mailto:kamyar.hadian@helmholtz-muenchen.de)

## SUPPORTING FIGURES

| Cell death inducer | Treatment time | % cell death (relative to DMSO control) |
|--------------------|----------------|-----------------------------------------|
| RSL3               | 2h             | 13.2%                                   |
|                    | 3h             | 28.2%                                   |
|                    | 4h             | 51.5%                                   |
| IKE                | 6h             | 2.7%                                    |
|                    | 7h             | 13.3%                                   |
|                    | 8h             | 15.5%                                   |
| STS                | 6h             | 16.7%                                   |
|                    | 7h             | 25.4%                                   |
|                    | 8h             | 30.8%                                   |

**Supplementary Figure S1.** Pilot study using CellTiter-Glo viability assay to assess optimal cell death inducer concentration and timepoint. HT-1080 cells were treated with ferroptosis inducers RSL3 (1  $\mu$ M) or IKE (20  $\mu$ M), apoptosis inducer STS (1  $\mu$ M), or DMSO vehicle control, at various timepoints. Using a CellTiter-Glo viability assay, an optimal treatment timepoint (identified above by the highlighted rows) was determined for each treatment when percentage cell death reached between 10-20%.

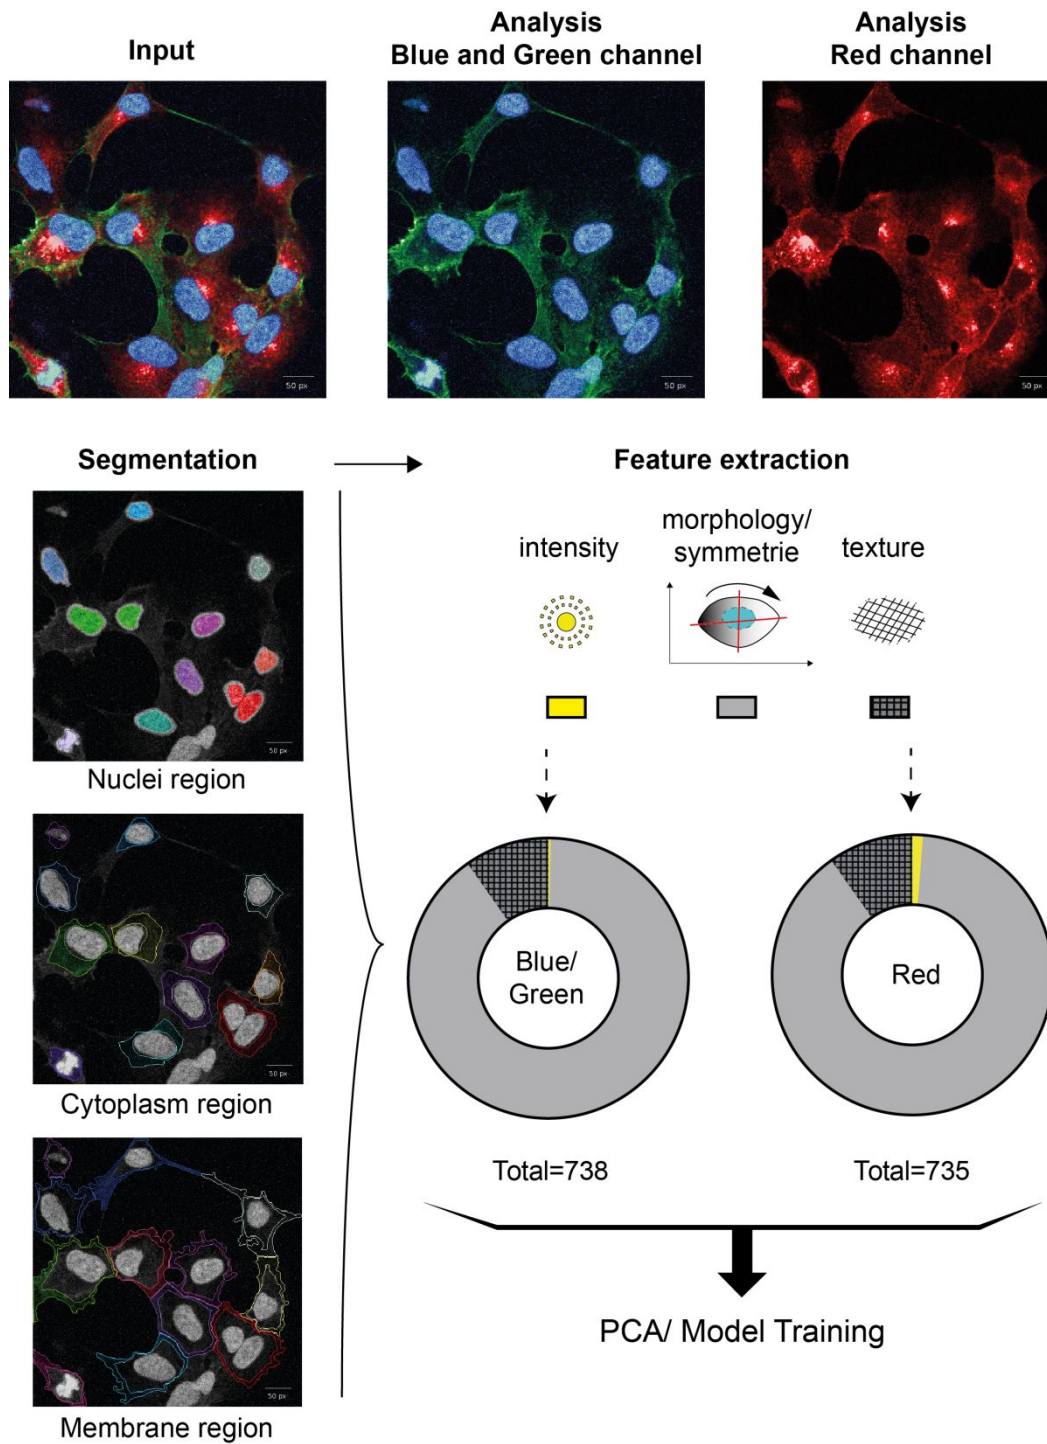

**Supplementary Figure 2.** Illustrative figures with a workflow of the automated image analysis and data extraction. In each image, the nuclei were identified using DAPI staining. The cytoplasm and membrane region were segmented using phalloidin-FITC staining. Subsequently, a large number of features (intensity, morphology/ symmetry, texture) were extracted for each cell segment by processing and analyzing the blue-green and red fluorescence signals. All data were then combined and used for further analyzes. For detailed description see material and methods section.

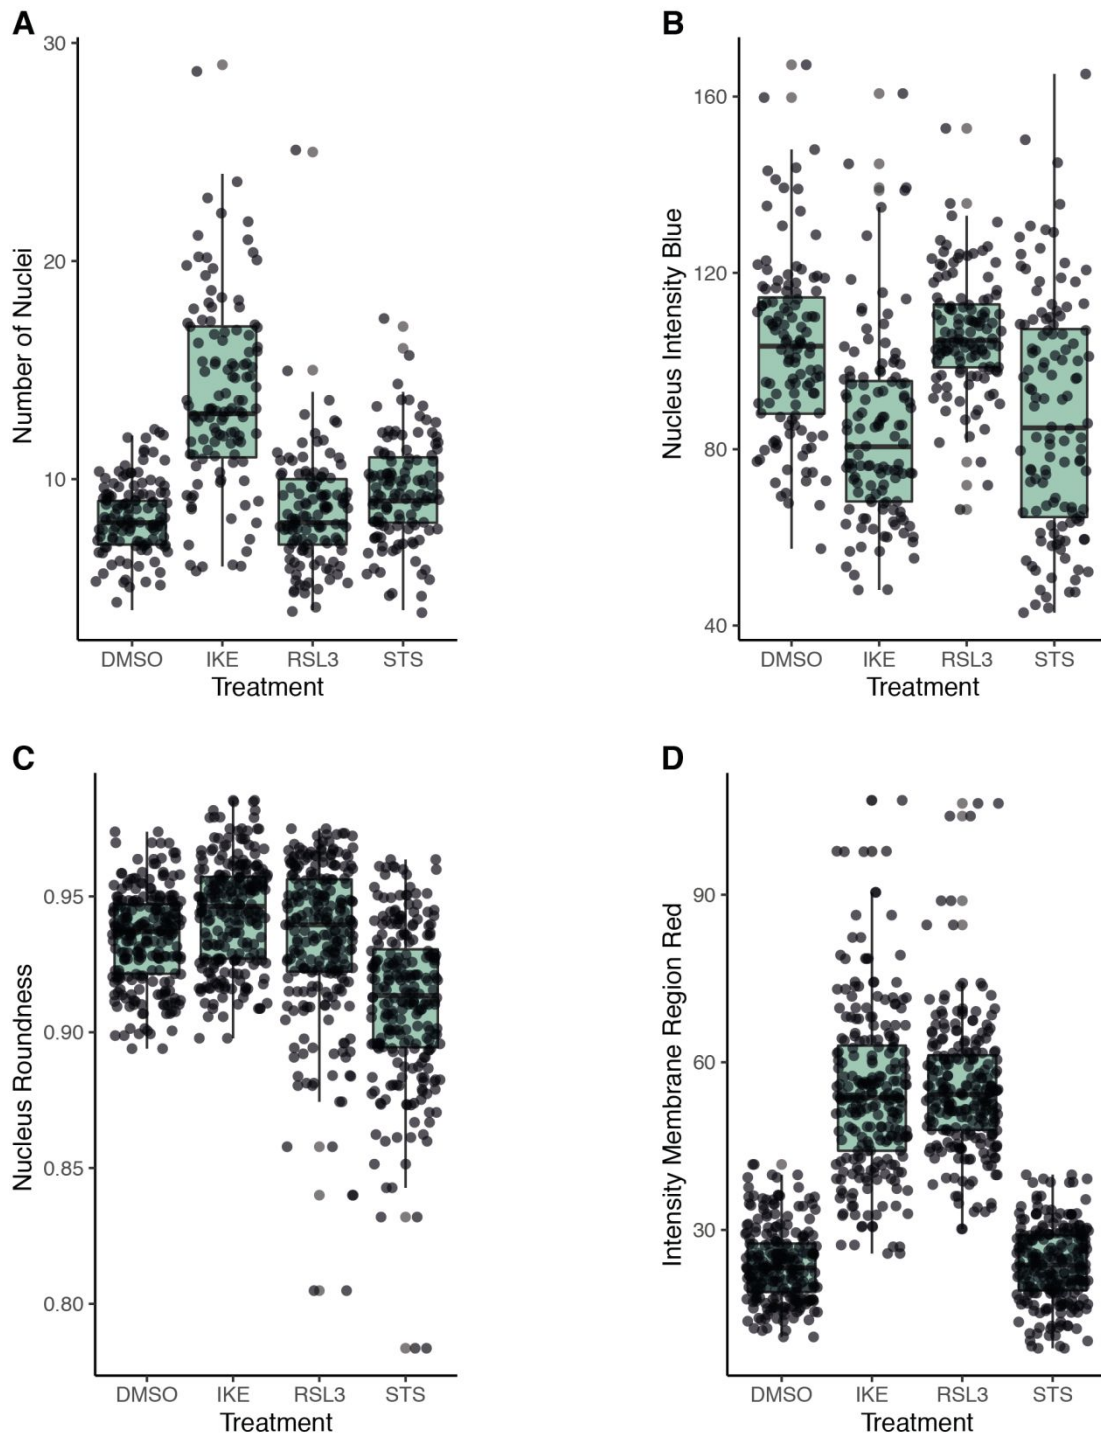

**Supplementary Figure 3.** Boxplots of representative features. Each dot shows (A) the sum or (B-C) the median value of an image feature. The data were sorted by treatment (DMSO, IKE, RSL3, STS). (A) Number of Nuclei; (B) Nucleus Blue Intensity; (C) Nucleus Roundness; (D) Membrane region red intensity.

**A**

| Cell death inducer      | % cell death (relative to DMSO control) |
|-------------------------|-----------------------------------------|
| RSL3 (1 $\mu$ M, 2.5 h) | 13.6%                                   |
| IKE (20 $\mu$ M, 8 h)   | 16.8%                                   |
| STS (1 $\mu$ M, 5.5 h)  | 12.1%                                   |

**test data set****B**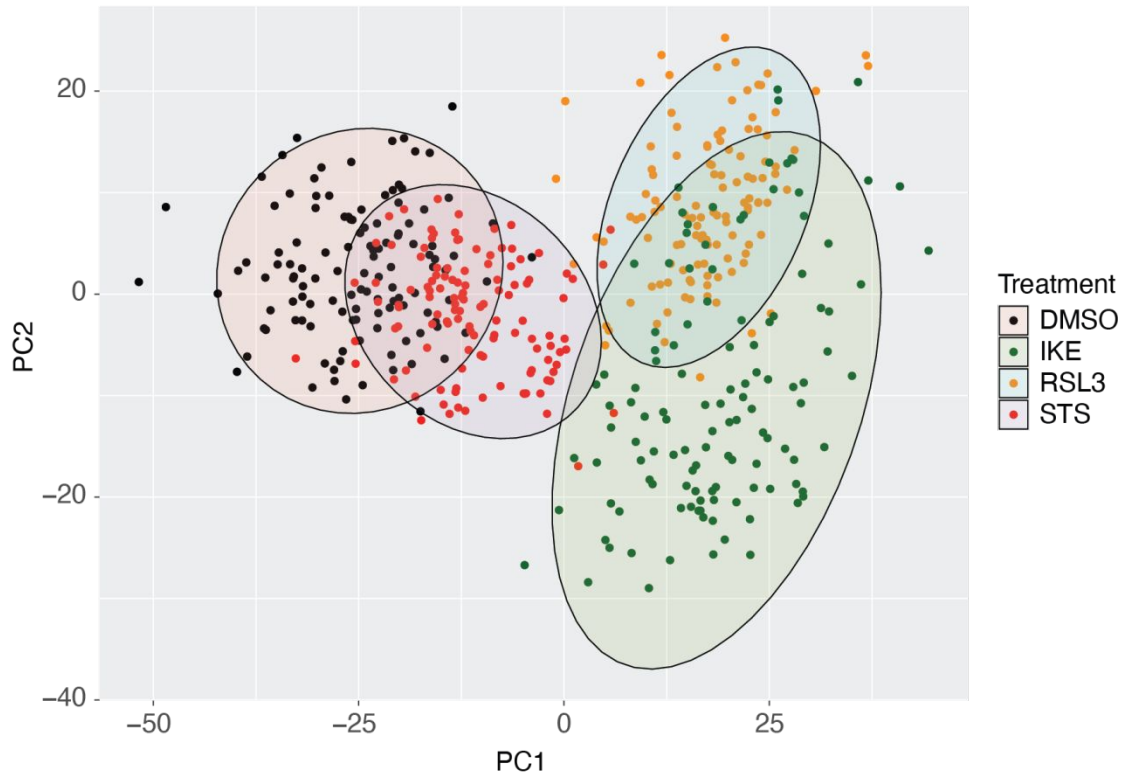

**Supplementary Figure 4.** CTG data and visualization of the extracted data for validation experiment (test data set): (A) CTG values for the different treatments that were generated in parallel to the immunofluorescent staining. (B) Principal component analysis of validation experiment. PC1 = 29,74% and PC2 = 7,96%.

## ANALYSIS SEQUENCES

### Blue-Green:

|                                        |                                                                                         |                                                                                                                                                                                    |                                                  |
|----------------------------------------|-----------------------------------------------------------------------------------------|------------------------------------------------------------------------------------------------------------------------------------------------------------------------------------|--------------------------------------------------|
| <b>Input Image</b>                     | <b>Stack Processing :</b><br>Individual Planes<br><b>Flatfield Correction :</b><br>None |                                                                                                                                                                                    |                                                  |
| <b>Filter Image</b>                    | <b>Channel :</b> Blue                                                                   | <b>Method :</b> Sliding Parabola<br>Curvature : 10                                                                                                                                 | Output Image :<br>Sliding<br>Parabola            |
| <b>Filter Image (2)</b>                | <b>Channel :</b> Sliding Parabola                                                       | <b>Method :</b> Smoothing<br>Filter : Median<br>Scale : 6 px                                                                                                                       | Output Image :<br>Median<br>Smoothed Nuclei      |
| <b>Filter Image (3)</b>                | <b>Channel :</b> Green                                                                  | <b>Method :</b> Smoothing<br>Filter : Median<br>Scale : 3 px                                                                                                                       | Output Image :<br>Median<br>Smoothed             |
| <b>Find Nuclei</b>                     | <b>Channel :</b> Median<br>Smoothed<br>Nuclei<br><b>ROI :</b> None                      | <b>Method :</b> B<br>Common Threshold : 0.4<br>Area : > 150 px2<br>Split Factor : 10<br>Individual Threshold : 0.4<br>Contrast : > 0.1                                             | Output Population :<br>Nuclei                    |
| <b>Calculate Intensity Properties</b>  | <b>Channel :</b> Blue<br><b>Population :</b> Nuclei<br><b>Region :</b> Nucleus          | <b>Method :</b> Standard<br>Mean                                                                                                                                                   | Output Properties :<br>Intensity<br>Nucleus Blue |
| <b>Calculate Morphology Properties</b> | <b>Population :</b> Nuclei<br><b>Region :</b> Nucleus                                   | <b>Method :</b> Standard<br>Area<br>Roundness<br>Width<br>Length<br>Ratio Width to Length<br>Output Properties :<br>Nucleus                                                        | Output Properties :<br>Nucleus                   |
| <b>Select Population</b>               | <b>Population :</b> Nuclei                                                              | <b>Method :</b> Filter by Property<br>Intensity Nucleus Blue Mean :<br>> 35<br>Nucleus Roundness : > 0.6<br>Nucleus Area [px2] : > 300<br>Boolean Operations : F1 and<br>F2 and F3 | Output Population :<br>Nuclei<br>Selected        |
| <b>Find Cytoplasm</b>                  | <b>Channel :</b> Median<br>Smoothed<br><b>Nuclei :</b> Nuclei Selected                  | <b>Method :</b> A<br>Individual Threshold : 0.15                                                                                                                                   | Output Population :<br>Nuclei                    |

|                                         |                                                                                                            |                                                                                                                                                                                  |                                                    |
|-----------------------------------------|------------------------------------------------------------------------------------------------------------|----------------------------------------------------------------------------------------------------------------------------------------------------------------------------------|----------------------------------------------------|
| <b>Select Population (2) :</b>          | <b>Population :</b> Nuclei Selected                                                                        | <b>Method :</b> Common Filters<br>Remove Border Objects<br>Region : Nucleus                                                                                                      | Output Population :<br>Nuclei Selected<br>Selected |
| <b>Select Cell Region</b>               | <b>Population :</b> Nuclei Selected<br>Selected                                                            | <b>Method :</b> Resize Region [%]<br>Region Type : Cytoplasm<br>Region<br>Outer Border : 15 %<br>Inner Border : 40 %                                                             | Output Region :<br>Cytoplasm<br>Region             |
| <b>Select Cell Region (2)</b>           | <b>Population :</b> Nuclei Selected<br>Selected                                                            | <b>Method :</b> Resize Region [%]<br>Region Type : Membrane<br>Region<br>Outer Border : -10 %<br>Inner Border : 10 %                                                             | Output Region :<br>Membrane<br>Region              |
| <b>Select Cell Region (3)</b>           | <b>Population :</b> Nuclei Selected<br>Selected                                                            | <b>Method :</b> Resize Region [%]<br>Region Type : Nucleus<br>Region<br>Outer Border : 55 %<br>Inner Border : 100 %                                                              | Output Region :<br>Nucleus<br>Region               |
| <b>Calculate Texture Properties (1)</b> | <b>Channel :</b> Blue<br><b>Population :</b> Nuclei Selected<br>Selected<br><b>Region :</b> Nucleus Region | <b>Method :</b> SER Features<br>Scale : 0 px<br>Normalization by : Kernel<br>SER Spot<br>SER Hole<br>SER Edge<br>SER Ridge<br>SER Valley<br>SER Saddle<br>SER Bright<br>SER Dark | Output Properties :<br>Nucleus<br>Region Blue      |
| <b>Calculate Texture Properties (2)</b> | <b>Channel :</b> Blue<br><b>Population :</b> Nuclei Selected<br>Selected                                   | <b>Method :</b> SER Features<br>Scale : 1 px<br>Normalization by : Kernel<br>SER Spot<br>SER Hole<br>SER Edge<br>SER Ridge<br>SER Valley<br>SER Saddle<br>SER Bright<br>SER Dark | Output Properties :<br>Nucleus<br>Region Blue      |
| <b>Calculate Texture Properties (3)</b> | <b>Channel :</b> Blue<br><b>Population :</b> Nuclei Selected<br>Selected<br><b>Region :</b> Nucleus Region | <b>Method :</b> SER Features<br>Scale : 2 px<br>Normalization by : Kernel<br>SER Spot<br>SER Hole<br>SER Edge<br>SER Ridge<br>SER Valley<br>SER Saddle<br>SER Bright<br>SER Dark | Output Properties :<br>Nucleus<br>Region Blue      |

|                                                   |                                                                                                                             |                                                                                                                                                                                                                                                                                                                                                                                                                                                                 |                                                                         |
|---------------------------------------------------|-----------------------------------------------------------------------------------------------------------------------------|-----------------------------------------------------------------------------------------------------------------------------------------------------------------------------------------------------------------------------------------------------------------------------------------------------------------------------------------------------------------------------------------------------------------------------------------------------------------|-------------------------------------------------------------------------|
| <p><b>Calculate Morphology Properties (2)</b></p> | <p><b>Population :</b> Nuclei<br/>Selected<br/>Selected<br/><b>Region :</b> Nucleus Region</p>                              | <p><b>Method :</b> STAR<br/>Channel : Blue<br/>Symmetry<br/>Threshold Compactness<br/>Axial<br/>Radial<br/>Profile<br/>Profile Inner Region : Nucleus<br/>Profile Width : 10 px<br/><b>Sliding Parabola</b><br/>Sliding Parabola<br/>Curvature : 10<br/>Use for Center<br/><b>Texture SER</b><br/>Scale : 1 px<br/>Normalization by : Kernel<br/>SER Spot<br/>SER Hole<br/>SER Edge<br/>SER Ridge<br/>SER Valley<br/>SER Saddle<br/>SER Bright<br/>SER Dark</p> | <p>Output Properties :<br/>Nucleus Region</p>                           |
| <p><b>Calculate Intensity Properties (2)</b></p>  | <p><b>Channel :</b> Green<br/><b>Population :</b> Nuclei<br/>Selected<br/>Selected<br/><b>Region :</b> Cytoplasm Region</p> | <p><b>Method :</b> Standard<br/>Mean</p>                                                                                                                                                                                                                                                                                                                                                                                                                        | <p>Output Properties :<br/>Intensity<br/>Cytoplasm Region<br/>Green</p> |
| <p><b>Calculate Morphology Properties (3)</b></p> | <p><b>Population :</b> Nuclei<br/>Selected<br/>Selected<br/><b>Region :</b> Cytoplasm Region</p>                            | <p><b>Method :</b> Standard<br/>Area<br/>Roundness<br/>Width<br/>Length<br/>Ratio Width to Length</p>                                                                                                                                                                                                                                                                                                                                                           | <p>Output Properties :<br/>Cytoplasm Region</p>                         |
| <p><b>Calculate Texture Properties (4)</b></p>    | <p><b>Channel :</b> Green<br/><b>Population :</b> Nuclei<br/>Selected<br/>Selected<br/><b>Region :</b> Cytoplasm Region</p> | <p><b>Method :</b> SER Features<br/>Scale : 0 px<br/>Normalization by : Kernel<br/>SER Spot<br/>SER Hole<br/>SER Edge<br/>SER Ridge<br/>SER Valley<br/>SER Saddle<br/>SER Bright<br/>SER Dark</p>                                                                                                                                                                                                                                                               | <p>Output Properties :<br/>Cytoplasm Region<br/>Green</p>               |
| <p><b>Calculate Texture Properties (5)</b></p>    | <p><b>Channel :</b> Green<br/><b>Population :</b> Nuclei<br/>Selected<br/>Selected<br/><b>Region :</b> Cytoplasm</p>        | <p><b>Method :</b> SER Features<br/>Scale : 1 px<br/>Normalization by : Kernel<br/>SER Spot<br/>SER Hole</p>                                                                                                                                                                                                                                                                                                                                                    | <p>Output Properties :<br/>Cytoplasm Region<br/>Green</p>               |



|                                            |                                                                                                               |                                                                                                                                                                                                                                                                                                                                                                                                                                    |                                                  |
|--------------------------------------------|---------------------------------------------------------------------------------------------------------------|------------------------------------------------------------------------------------------------------------------------------------------------------------------------------------------------------------------------------------------------------------------------------------------------------------------------------------------------------------------------------------------------------------------------------------|--------------------------------------------------|
|                                            | Region                                                                                                        | SER Edge<br>SER Ridge<br>SER Valley<br>SER Saddle<br>SER Bright<br>SER Dark                                                                                                                                                                                                                                                                                                                                                        |                                                  |
| <b>Calculate Texture Properties (6)</b>    | <b>Channel :</b> Green<br><b>Population :</b> Nuclei Selected<br>Selected<br><b>Region :</b> Cytoplasm Region | <b>Method :</b> SER Features<br>Scale : 2 px<br>Normalization by : Kernel<br>SER Spot<br>SER Hole<br>SER Edge<br>SER Ridge<br>SER Valley<br>SER Saddle<br>SER Bright<br>SER Dark                                                                                                                                                                                                                                                   | Output Properties :<br>Cytoplasm Region<br>Green |
| <b>Calculate Morphology Properties (4)</b> | <b>Population :</b> Nuclei Selected<br>Selected<br><b>Region :</b> Cytoplasm Region                           | <b>Method :</b> STAR<br>Channel : Green<br>Symmetry<br>Threshold Compactness<br>Axial<br>Radial<br>Profile<br>Profile Inner Region : Nucleus<br>Profile Width : 10 px<br><b>Sliding Parabola</b><br>Sliding Parabola<br>Curvature : 10<br>Use for Center<br><b>Texture SER</b><br>Scale : 1 px<br>Normalization by : Kernel<br>SER Spot<br>SER Hole<br>SER Edge<br>SER Ridge<br>SER Valley<br>SER Saddle<br>SER Bright<br>SER Dark | Output Properties :<br>Cytoplasm Region          |
| <b>Calculate Texture Properties (7)</b>    | <b>Channel :</b> Green<br><b>Population :</b> Nuclei Selected<br>Selected<br><b>Region :</b> Membrane Region  | <b>Method :</b> SER Features<br>Scale : 0 px<br>Normalization by : Kernel<br>SER Spot<br>SER Hole<br>SER Edge<br>SER Ridge<br>SER Valley<br>SER Saddle<br>SER Bright<br>SER Hole                                                                                                                                                                                                                                                   | Output Properties :<br>Membrane Region<br>Green  |

|                                            |                                                                                                              |                                                                                                                                                                                                                                                                                                                                                                                                                                    |                                                 |
|--------------------------------------------|--------------------------------------------------------------------------------------------------------------|------------------------------------------------------------------------------------------------------------------------------------------------------------------------------------------------------------------------------------------------------------------------------------------------------------------------------------------------------------------------------------------------------------------------------------|-------------------------------------------------|
|                                            |                                                                                                              | SER Edge<br>SER Ridge<br>SER Valley<br>SER Saddle<br>SER Bright<br>SER Dark                                                                                                                                                                                                                                                                                                                                                        |                                                 |
| <b>Calculate Texture Properties (8)</b>    | <b>Channel</b> : Green<br><b>Population</b> : Nuclei Selected<br>Selected<br><b>Region</b> : Membrane Region | <b>Method</b> : SER Features<br>Scale : 1 px<br>Normalization by : Kernel<br>SER Spot<br>SER Hole<br>SER Edge<br>SER Ridge<br>SER Valley<br>SER Saddle<br>SER Bright<br>SER Dark                                                                                                                                                                                                                                                   | Output Properties :<br>Membrane Region<br>Green |
| <b>Calculate Texture Properties (9)</b>    | <b>Channel</b> : Green<br><b>Population</b> : Nuclei Selected<br>Selected<br><b>Region</b> : Membrane Region | <b>Method</b> : SER Features<br>Scale : 2 px<br>Normalization by : Kernel<br>SER Spot<br>SER Hole<br>SER Edge<br>SER Ridge<br>SER Valley<br>SER Saddle<br>SER Bright<br>SER Dark                                                                                                                                                                                                                                                   | Output Properties :<br>Membrane Region<br>Green |
| <b>Calculate Morphology Properties (5)</b> | <b>Population</b> : Nuclei Selected<br>Selected<br><b>Region</b> : Membrane Region                           | <b>Method</b> : STAR<br>Channel : Green<br>Symmetry<br>Threshold Compactness<br>Axial<br>Radial<br>Profile<br>Profile Inner Region : Nucleus<br>Profile Width : 10 px<br><b>Sliding Parabola</b><br>Sliding Parabola<br>Curvature : 10<br>Use for Center<br><b>Texture SER</b><br>Scale : 1 px<br>Normalization by : Kernel<br>SER Spot<br>SER Hole<br>SER Edge<br>SER Ridge<br>SER Valley<br>SER Saddle<br>SER Bright<br>SER Dark | Output Properties :<br>Membrane Region          |

Red:

|                                        |                                                                                         |                                                                                                                                                                                              |                                              |
|----------------------------------------|-----------------------------------------------------------------------------------------|----------------------------------------------------------------------------------------------------------------------------------------------------------------------------------------------|----------------------------------------------|
| <b>Input Image</b>                     | <b>Stack Processing :</b><br>Individual Planes<br><b>Flatfield Correction :</b><br>None |                                                                                                                                                                                              |                                              |
| <b>Filter Image</b>                    | <b>Channel :</b> Blue                                                                   | <b>Method :</b> Sliding Parabola<br>Curvature : 10                                                                                                                                           | Output Image : Sliding Parabola              |
| <b>Filter Image (2)</b>                | <b>Channel :</b> Sliding Parabola                                                       | <b>Method :</b> Smoothing<br>Filter : Median<br>Scale : 6 px                                                                                                                                 | Output Image : Median Smoothed Nuclei        |
| <b>Filter Image (3)</b>                | <b>Channel :</b> Green                                                                  | <b>Method :</b> Smoothing<br>Filter : Median<br>Scale : 3 px                                                                                                                                 | Output Image : Median Smoothed               |
| <b>Find Nuclei</b>                     | <b>Channel :</b> Median Smoothed Nuclei<br><b>ROI :</b> None                            | <b>Method :</b> B<br>Common Threshold : 0.4<br>Area : > 150 px <sup>2</sup><br>Split Factor : 10<br>Individual Threshold : 0.4<br>Contrast : > 0.1                                           | Output Population : Nuclei                   |
| <b>Calculate Intensity Properties</b>  | <b>Channel :</b> Blue<br><b>Population :</b> Nuclei<br><b>Region :</b> Nucleus          | <b>Method :</b> Standard Mean                                                                                                                                                                | Output Properties : Intensity Nucleus Blue   |
| <b>Calculate Morphology Properties</b> | <b>Population :</b> Nuclei<br><b>Region :</b> Nucleus                                   | <b>Method :</b> Standard<br>Area<br>Roundness<br>Width<br>Length<br>Ratio Width to Length                                                                                                    | Output Properties : Nucleus                  |
| <b>Select Population</b>               | <b>Population :</b> Nuclei                                                              | <b>Method :</b> Filter by Property<br>Intensity Nucleus Blue Mean :<br>> 35<br>Nucleus Roundness : > 0.6<br>Nucleus Area [px <sup>2</sup> ] : > 300<br>Boolean Operations : F1 and F2 and F3 | Output Population : Nuclei Selected          |
| <b>Find Cytoplasm</b>                  | <b>Channel :</b> Median Smoothed<br><b>Nuclei :</b> Nuclei Selected                     | <b>Method :</b> A<br>Individual Threshold : 0.15                                                                                                                                             |                                              |
| <b>Select Population (2)</b>           | <b>Population :</b> Nuclei Selected                                                     | <b>Method :</b> Common Filters<br>Remove Border Objects<br>Region : Nucleus                                                                                                                  | Output Population : Nuclei Selected Selected |
| <b>Select Cell Region</b>              | <b>Population :</b> Nuclei Selected<br>Selected                                         | <b>Method :</b> Resize Region [%]<br>Region Type : Membrane Region<br>Outer Border : -10 %<br>Inner Border : 10 %                                                                            | Output Region : Membrane Region              |
| <b>Select Cell Region (2)</b>          | <b>Population :</b> Nuclei Selected<br>Selected                                         | <b>Method :</b> Resize Region [%]<br>Region Type : Cytoplasm Region<br>Outer Border : 15 %<br>Inner Border : 40 %                                                                            | Output Region : Cytoplasm Region             |
| <b>Select</b>                          | <b>Population :</b> Nuclei                                                              | <b>Method :</b> Resize Region [%]                                                                                                                                                            | Output Region :                              |

|                                           |                                                                                                                   |                                                                                                                                                                                  |                                                             |
|-------------------------------------------|-------------------------------------------------------------------------------------------------------------------|----------------------------------------------------------------------------------------------------------------------------------------------------------------------------------|-------------------------------------------------------------|
| <b>Cell Region (3)</b>                    | Selected<br>Selected                                                                                              | Region Type : Nucleus<br>Region<br>Outer Border : 55 %<br>Inner Border : 100 %                                                                                                   | Nucleus<br>Region                                           |
| <b>Calculate Intensity Properties (2)</b> | <b>Channel</b> : Red<br><b>Population</b> : Nuclei<br>Selected<br>Selected<br><b>Region</b> : Membrane<br>Region  | <b>Method</b> : Standard<br>Mean<br>Median<br>Contrast                                                                                                                           | Output Properties :<br>Intensity<br>Membrane Region<br>Red  |
| <b>Calculate Intensity Properties (3)</b> | <b>Channel</b> : Red<br><b>Population</b> : Nuclei<br>Selected<br>Selected<br><b>Region</b> : Cytoplasm<br>Region | <b>Method</b> : Standard<br>Mean<br>Median<br>Contrast                                                                                                                           | Output Properties :<br>Intensity<br>Cytoplasm Region<br>Red |
| <b>Calculate Intensity Properties (4)</b> | <b>Channel</b> : Red<br><b>Population</b> : Nuclei<br>Selected<br>Selected<br><b>Region</b> : Nucleus Region      | <b>Method</b> : Standard<br>Mean<br>Median<br>Contrast                                                                                                                           | Output Properties :<br>Intensity<br>Nucleus Region Red      |
| <b>Calculate Texture Properties</b>       | <b>Channel</b> : Red<br><b>Population</b> : Nuclei<br>Selected<br>Selected<br><b>Region</b> : Membrane<br>Region  | <b>Method</b> : SER Features<br>Scale : 0 px<br>Normalization by : Kernel<br>SER Spot<br>SER Hole<br>SER Edge<br>SER Ridge<br>SER Valley<br>SER Saddle<br>SER Bright<br>SER Dark | Output Properties :<br>Membrane Region<br>Red               |
| <b>Calculate Texture Properties (2)</b>   | <b>Channel</b> : Red<br><b>Population</b> : Nuclei<br>Selected<br>Selected<br><b>Region</b> : Cytoplasm<br>Region | <b>Method</b> : SER Features<br>Scale : 0 px<br>Normalization by : Kernel<br>SER Spot<br>SER Hole<br>SER Edge<br>SER Ridge<br>SER Valley<br>SER Saddle<br>SER Bright<br>SER Dark | Output Properties :<br>Cytoplasm Region<br>Red              |
| <b>Calculate Texture Properties (3)</b>   | <b>Channel</b> : Red<br><b>Population</b> : Nuclei<br>Selected<br>Selected<br><b>Region</b> : Nucleus Region      | <b>Method</b> : SER Features<br>Scale : 0 px<br>Normalization by : Kernel<br>SER Spot<br>SER Hole<br>SER Edge<br>SER Ridge<br>SER Valley<br>SER Saddle<br>SER Bright<br>SER Dark | Output Properties :<br>Nucleus<br>Region Red                |
| <b>Calculate</b>                          | <b>Channel</b> : Red                                                                                              | <b>Method</b> : SER Features                                                                                                                                                     | Output Properties :                                         |

|                                         |                                                                                                                |                                                                                                                                                                                  |                                                |
|-----------------------------------------|----------------------------------------------------------------------------------------------------------------|----------------------------------------------------------------------------------------------------------------------------------------------------------------------------------|------------------------------------------------|
| <b>Texture Properties (4)</b>           | <b>Population</b> : Nuclei<br>Selected<br>Selected<br><b>Region</b> : Membrane Region                          | Scale : 1 px<br>Normalization by : Kernel<br>SER Spot<br>SER Hole<br>SER Edge<br>SER Ridge<br>SER Valley<br>SER Saddle<br>SER Bright<br>SER Dark                                 | Membrane Region<br>Red                         |
| <b>Calculate Texture Properties (5)</b> | <b>Channel</b> : Red<br><b>Population</b> : Nuclei<br>Selected<br>Selected<br><b>Region</b> : Cytoplasm Region | <b>Method</b> : SER Features<br>Scale : 1 px<br>Normalization by : Kernel<br>SER Spot<br>SER Hole<br>SER Edge<br>SER Ridge<br>SER Valley<br>SER Saddle<br>SER Bright<br>SER Dark | Output Properties :<br>Cytoplasm Region<br>Red |
| <b>Calculate Texture Properties (6)</b> | <b>Channel</b> : Red<br><b>Population</b> : Nuclei<br>Selected<br>Selected<br><b>Region</b> : Nucleus Region   | <b>Method</b> : SER Features<br>Scale : 1 px<br>Normalization by : Kernel<br>SER Spot<br>SER Hole<br>SER Edge<br>SER Ridge<br>SER Valley<br>SER Saddle<br>SER Bright<br>SER Dark | Output Properties :<br>Nucleus<br>Region Red   |
| <b>Calculate Texture Properties (7)</b> | <b>Channel</b> : Red<br><b>Population</b> : Nuclei<br>Selected<br>Selected<br><b>Region</b> : Membrane Region  | <b>Method</b> : SER Features<br>Scale : 2 px<br>Normalization by : Kernel<br>SER Spot<br>SER Hole<br>SER Edge<br>SER Ridge<br>SER Valley<br>SER Saddle<br>SER Bright<br>SER Dark | Output Properties :<br>Membrane Region<br>Red  |
| <b>Calculate Texture Properties (8)</b> | <b>Channel</b> : Red<br><b>Population</b> : Nuclei<br>Selected<br>Selected<br><b>Region</b> : Cytoplasm Region | <b>Method</b> : SER Features<br>Scale : 2 px<br>Normalization by : Kernel<br>SER Spot<br>SER Hole<br>SER Edge<br>SER Ridge<br>SER Valley<br>SER Saddle<br>SER Bright<br>SER Dark | Output Properties :<br>Cytoplasm Region<br>Red |
| <b>Calculate Texture</b>                | <b>Channel</b> : Red<br><b>Population</b> : Nuclei                                                             | <b>Method</b> : SER Features<br>Scale : 2 px                                                                                                                                     | Output Properties :<br>Nucleus                 |

|                                            |                                                                                        |                                                                                                                                                                                                                                                                                                                                                                                                                                     |                                         |
|--------------------------------------------|----------------------------------------------------------------------------------------|-------------------------------------------------------------------------------------------------------------------------------------------------------------------------------------------------------------------------------------------------------------------------------------------------------------------------------------------------------------------------------------------------------------------------------------|-----------------------------------------|
| <b>Properties (9)</b>                      | Selected<br>Selected<br><b>Region</b> : Nucleus Region                                 | Normalization by : Kernel<br>SER Spot<br>SER Hole<br>SER Edge<br>SER Ridge<br>SER Valley<br>SER Saddle<br>SER Bright<br>SER Dark                                                                                                                                                                                                                                                                                                    | Region Red                              |
| <b>Calculate Morphology Properties (2)</b> | <b>Population</b> : Nuclei<br>Selected<br>Selected<br><b>Region</b> : Nucleus Region   | <b>Method</b> : STAR<br>Channel : Red<br>Symmetry<br>Threshold Compactness<br>Axial<br>Radial<br>Profile<br>Profile Inner Region :<br>Nucleus<br>Profile Width : 10 px<br><b>Sliding Parabola</b><br>Sliding Parabola<br>Curvature : 10<br>Use for Center<br><b>Texture SER</b><br>Scale : 1 px<br>Normalization by : Kernel<br>SER Spot<br>SER Hole<br>SER Edge<br>SER Ridge<br>SER Valley<br>SER Saddle<br>SER Bright<br>SER Dark | Output Properties :<br>Nucleus Region   |
| <b>Calculate Morphology Properties (3)</b> | <b>Population</b> : Nuclei<br>Selected<br>Selected<br><b>Region</b> : Cytoplasm Region | <b>Method</b> : STAR<br>Channel : Red<br>Symmetry<br>Threshold Compactness<br>Axial<br>Radial<br>Profile<br>Profile Inner Region :<br>Nucleus<br>Profile Width : 10 px<br><b>Sliding Parabola</b><br>Sliding Parabola<br>Curvature : 10<br>Use for Center<br><b>Texture SER</b><br>Scale : 1 px<br>Normalization by : Kernel<br>SER Spot<br>SER Hole<br>SER Edge<br>SER Ridge<br>SER Valley                                         | Output Properties :<br>Cytoplasm Region |

|                                            |                                                                                 |                                                                                                                                                                                                                                                                                                                                                                                                                                     |                                        |
|--------------------------------------------|---------------------------------------------------------------------------------|-------------------------------------------------------------------------------------------------------------------------------------------------------------------------------------------------------------------------------------------------------------------------------------------------------------------------------------------------------------------------------------------------------------------------------------|----------------------------------------|
|                                            |                                                                                 | SER Saddle<br>SER Bright<br>SER Dark                                                                                                                                                                                                                                                                                                                                                                                                |                                        |
| <b>Calculate Morphology Properties (4)</b> | <b>Population :</b> Nuclei Selected Selected<br><b>Region :</b> Membrane Region | <b>Method :</b> STAR<br>Channel : Red<br>Symmetry<br>Threshold Compactness<br>Axial<br>Radial<br>Profile<br>Profile Inner Region :<br>Nucleus<br>Profile Width : 10 px<br><b>Sliding Parabola</b><br>Sliding Parabola<br>Curvature : 10<br>Use for Center<br><b>Texture SER</b><br>Scale : 1 px<br>Normalization by : Kernel<br>SER Spot<br>SER Hole<br>SER Edge<br>SER Ridge<br>SER Valley<br>SER Saddle<br>SER Bright<br>SER Dark | Output Properties :<br>Membrane Region |
